# Supplementary material for: A highly elastic and flexible solid-state polymer electrolyte based on ionic liquid-decorated PMMA nanoparticles for lithium batteries
Source: Royal Society of Chemistry journal article supplement (doi:10.1039/c7nj02827j), 2017-01-01
Supplement: c7nj02827j1.pdf [file c7nj02827j1.pdf]

# Highly elastic and flexible solid-state polymer electrolyte based on ionic liquid-decorated PMMA nanoparticles for lithium batteries

Yang Li, Ka Wai Wong, Qianqian Dou, Wei Zhang, Lixiang Wang and Ka Ming Ng\*

Department of Chemical and Biological Engineering, The Hong Kong University of  
Science and Technology, Clear Water Bay, Hong Kong, China

\*Corresponding Author: Ka Ming Ng (kekmng@ust.hk)

## Supplementary Information

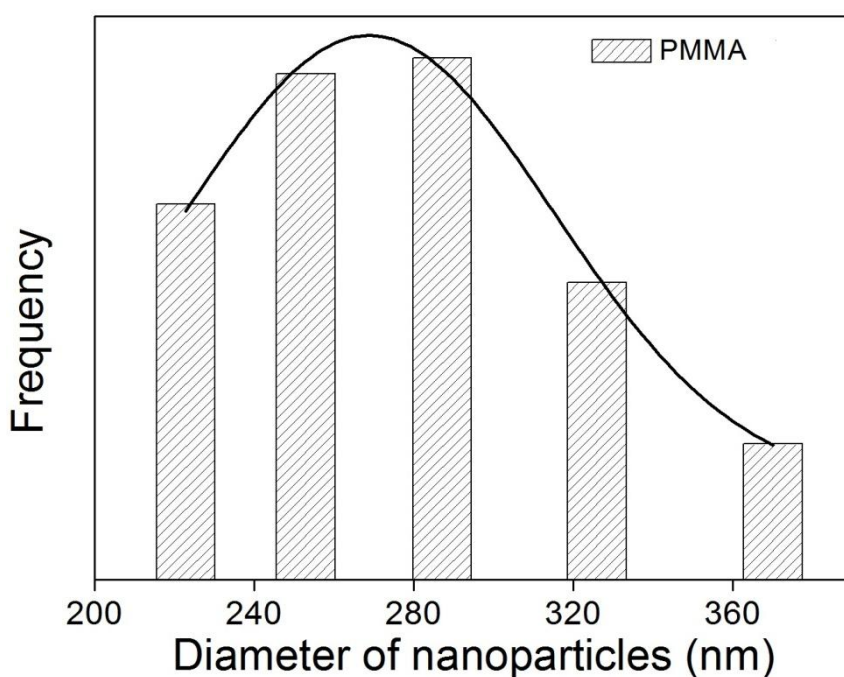

**Figure S1.** Relative size distribution of PMMA nanoparticles.

**Table S1.** VFT fitting parameters of ionic conductivities and lithium ion transference number ( $t_{Li^+}$ ) for PMMA-IL-TFSI/IL-TFSI SPEs.

| Weight fraction (wt%) | VFT Fitting Parameters |       |           | $t_{Li^+}$ |
|-----------------------|------------------------|-------|-----------|------------|
|                       | A ( $S\ cm^{-1}$ )     | B (K) | $T_0$ (K) |            |
| PMMA-IL-TFSI/IL-TFSI  |                        |       |           |            |
| 65                    | 3.43                   | 153   | 295       | 0.51       |
| 70                    | 2.22                   | 156   | 292       | 0.43       |
| 75                    | 0.64                   | 132   | 294       | 0.36       |
| 100                   | 0.051                  | 216   | 285       | -          |

**Table S2.** Summary of properties of current SPEs.

| Electrolyte           | Ionic conductivity ( $S\ cm^{-1}$ ) | $t_{Li^+}$ | Elongation-at-break (%) | Ref.      |
|-----------------------|-------------------------------------|------------|-------------------------|-----------|
| PMMA-IL-TFSI/IL-TFSI  | $5.12 \times 10^{-4}$               | 0.51       | 1600                    | This work |
| PSF-PEO35+LiTFSI+SN   | $1.6 \times 10^{-4}$                | -          | 2400                    | 32        |
| TMPEG-NPEG-LiTFSI     | $1.1 \times 10^{-4}$                | 0.27       | 1076                    | 33        |
| PEO-LAGP-LiTFSI       | $2.5 \times 10^{-5}$                | 0.385      | 140                     | 34        |
| PEO+Mg-BTC MOF/LiTFSI | $10^{-5}$                           | 0.4        | 117                     | 35        |
| PEO+GELPEO            | $10^{-4}$                           | -          | 80                      | 36        |
| PEO/PEGDA/DVB/LiTFSI  | $10^{-6}$                           | 0.21       | -                       | 37        |
| PEGMEM-co-MA-POSS     | $1.13 \times 10^{-4}$               | 0.35       | -                       | 38        |
| PEGMEM-co-SMA/LiTFSI  | $2.54 \times 10^{-5}$               | 0.202      | -                       | 39        |
| PVDF/PVA/MMT/ LiTFSI  | $4.31 \times 10^{-4}$               | 0.4        | -                       | 40        |
| PEO+LiTFSI+MIL53      | $3.39 \times 10^{-4}$               | 0.8        | -                       | 41        |
| MOMHS-PVDF-LiTFSI     | $8.7 \times 10^{-4}$                | 0.47       | -                       | 42        |
| PSiP/IL/LiTFSI        | $1.7 \times 10^{-3}$                | -          | -                       | 43        |
